# Supplementary material for: Cell Cycle Kinetics and Sister Chromatid Exchange in Mosaic Turner Syndrome
Source: Preprints.org preprint supplement (doi:10.20944/preprints202402.1549.v1), 2024-02-27
Supplement: Supplementary file 1 [file supplementary]

**PARTICIPANT 3**


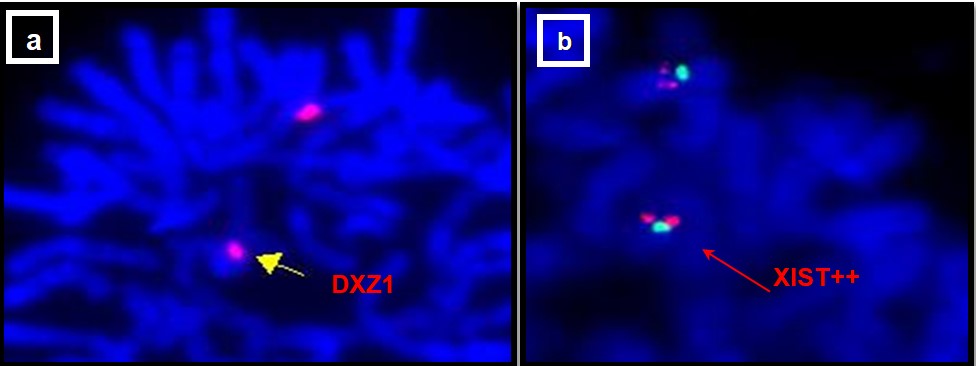


**Figure S1.** FISH results for participant 3. Partial metaphases showing the presence of a ring chromosome derived from chromosome X: (a) one copy of DXZ1 (red), and (b) two copies of XIST (red), indicated by yellow and red arrows, respectively.

**PARTICIPANT 4**


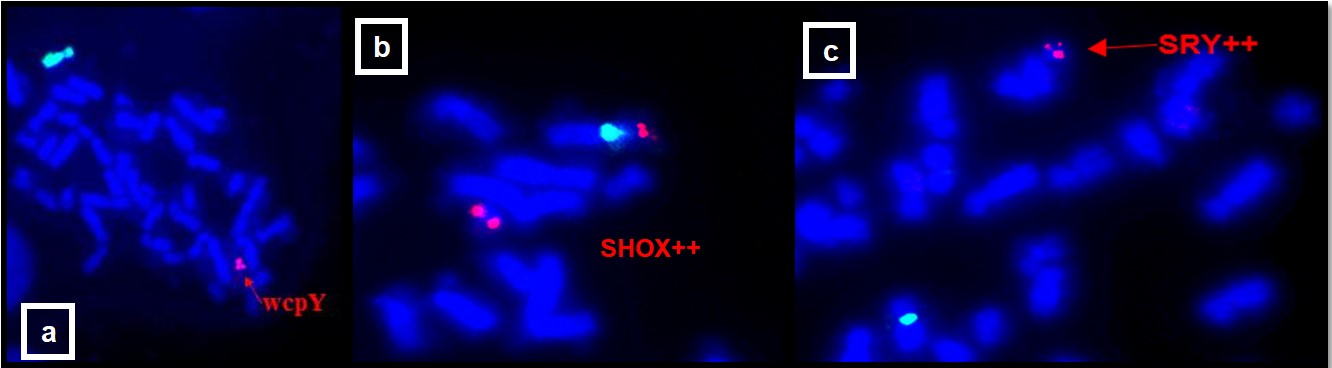


**Figure S2.** FISH results for participant 4. Partial metaphases showing the presence of an sSMC derived from chromosome Y: (a) signal of wcp Y (red); (b) one copy of DXZ1 (green) and two copies of SHOX (red); and (c) one copy of DXZ1 (green) and two copies of SRY (red), all indicated by red arrows.

.

**PARTICIPANT 5**


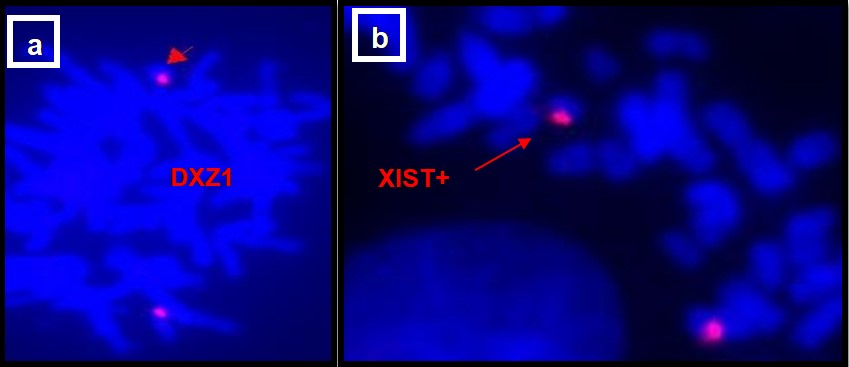


**Figure S3.** FISH results for participant 5. Partial metaphases showing the presence of an sSMC derived from X chromosome: (a) one copy of DXZ1 (red), and (b) one copy of XIST (red), all indicated by red arrows.

**PARTICIPANT 6**

**PARTICIPANT 6**


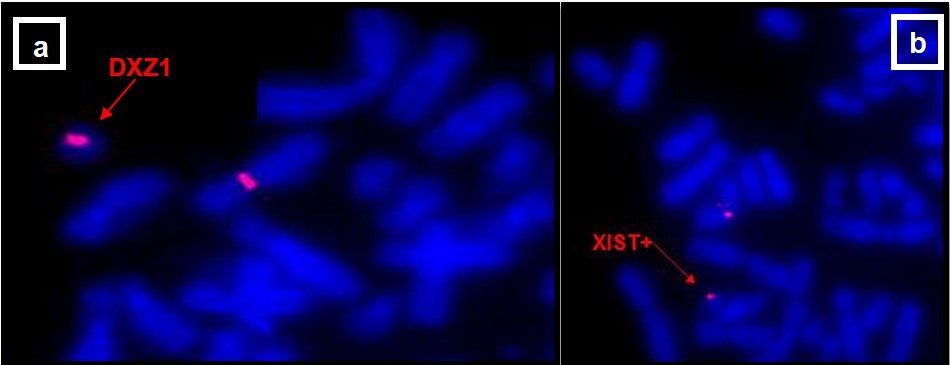


**Figure S4.** FISH results for participant 6. Partial metaphases showing the presence of an sSMC derived from X chromosome: (a) one copy of DXZ1 (red), and (b) one copy of XIST (red), all indicated by red arrows.

**PARTICIPANT 7**


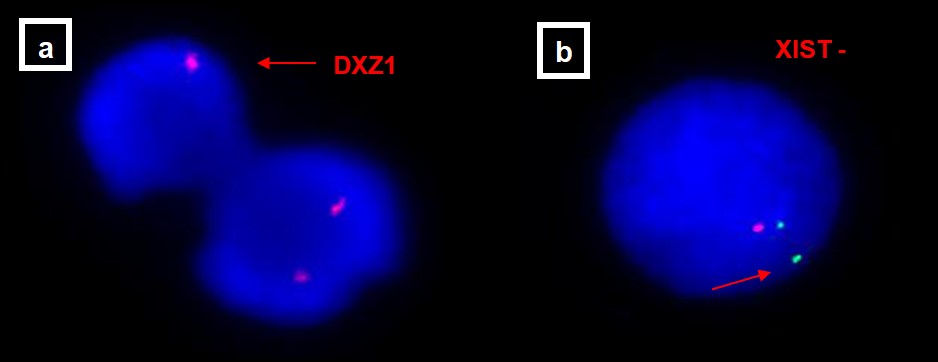


**Figure S5.** FISH results for participant 7. Interphase cells showing an sSMC derived from chromosome X: (a) one copy of DXZ1 (red), and (b) XIST negative, all indicated by red arrows.

**PARTICIPANT 8**


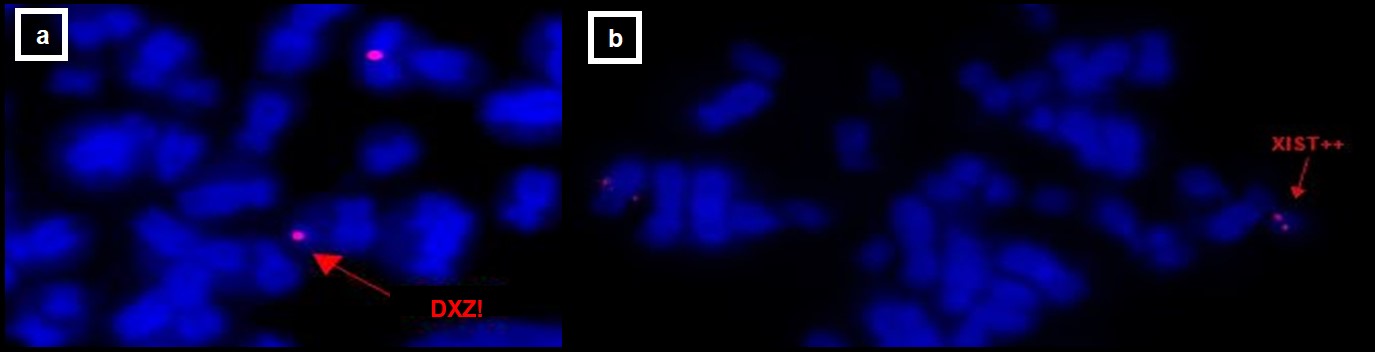


**Figure S6.** FISH results for participant 8. Partial metaphases showing the presence of an sSMC derived from X chromosome: (a) one copy of DXZ1 (red), and (b) two copies of XIST (red), all indicated by red arrows.

**PARTICIPANT 10**


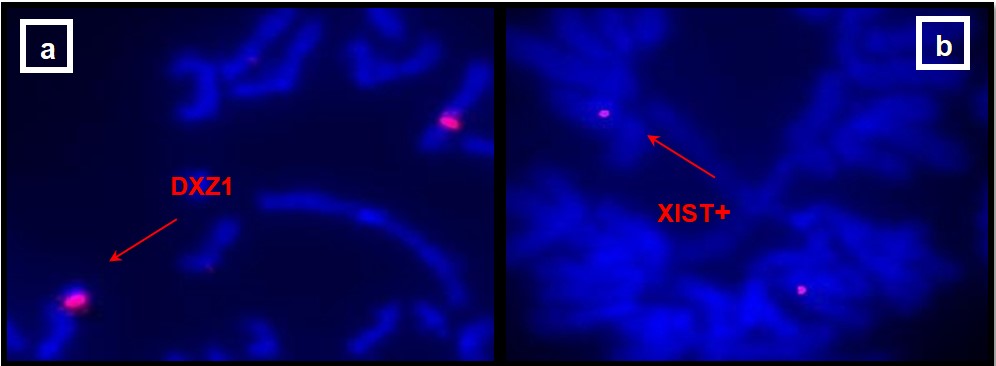


**Figure S7.** FISH results for participant 10. Partial metaphases showing the presence of an sSMC derived from X chromosome: (a) one copy of DXZ1 (red), and (b) one copy of XIST (red), all indicated by red arrows.

**PARTICIPANT 11**


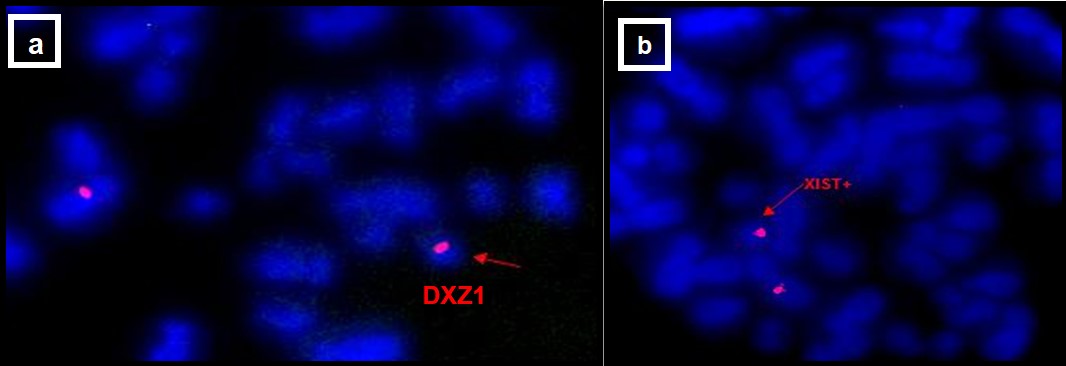


**Figure S8.** FISH results for participant 11. Partial metaphases showing the presence of an sSMC derived from X chromosome: (a) one copy of DXZ1 (red), and (b) one copy of XIST (red), all indicated by red arrows.

**PARTICIPANT 12**


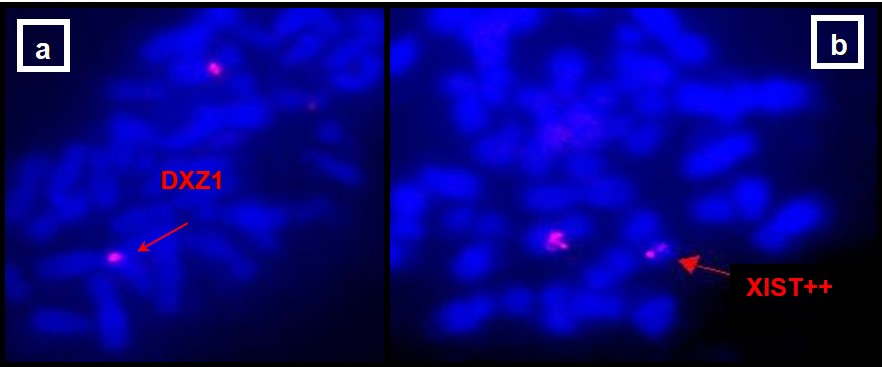


**Figure S9.** FISH results for participant 12. Partial metaphases showing the presence of an sSMC derived from X chromosome: (a) one copy of DXZ1 (red), and (b) two copies of XIST (red), all indicated by red arrows.

**PARTICIPANT 13**


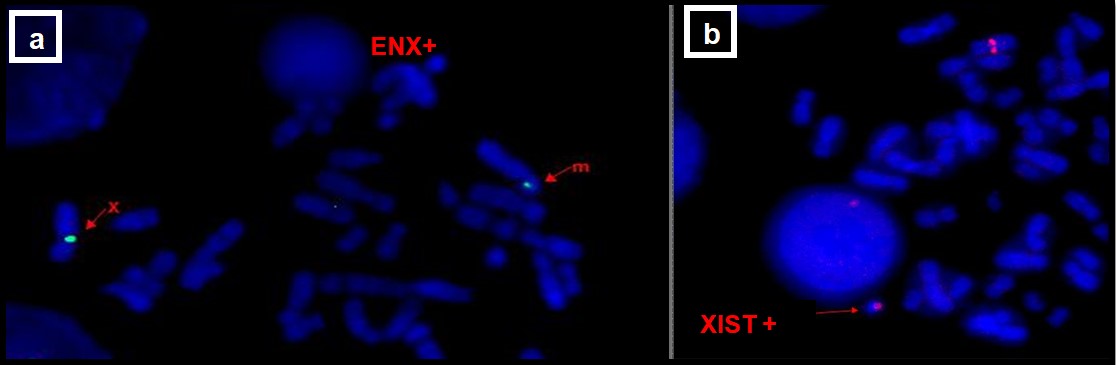


**Figure S10.** FISH results for participant 13. Partial metaphases showing the presence of an sSMC derived from X chromosome: (a) one copy of ENX (green, and (b) one copy of XIST (red), all indicated by red arrows.

**PARTICIPANT 14**


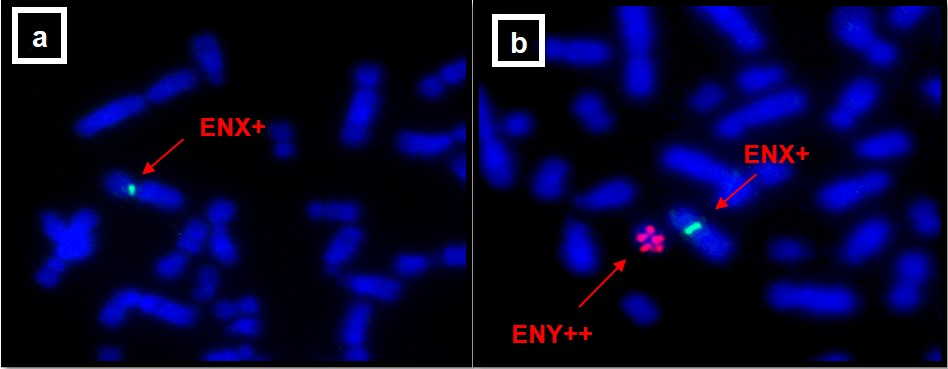


**Figure S11.** FISH results for participant 14. Partial metaphases showing the presence of an sSMC derived from Y chromosome: (a) one copy of ENX (green), and (b) one copy of ENX (green) and two copies of ENY (red), all indicated by red arrows.

**PARTICIPANT 16**


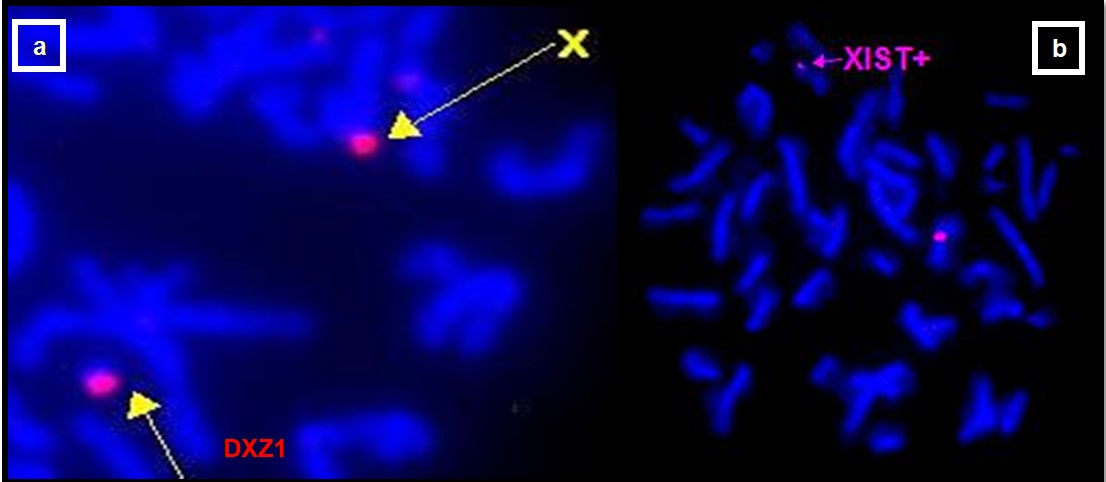


**Figure S12.** FISH results for participant 16. Partial metaphases showing the presence of an sSMC derived from X chromosome: (a) one copy of DXZ1 (red), and (b) one copy of XIST (red), indicated by yellow and red arrows, respectively.

**PARTICIPANT 17**


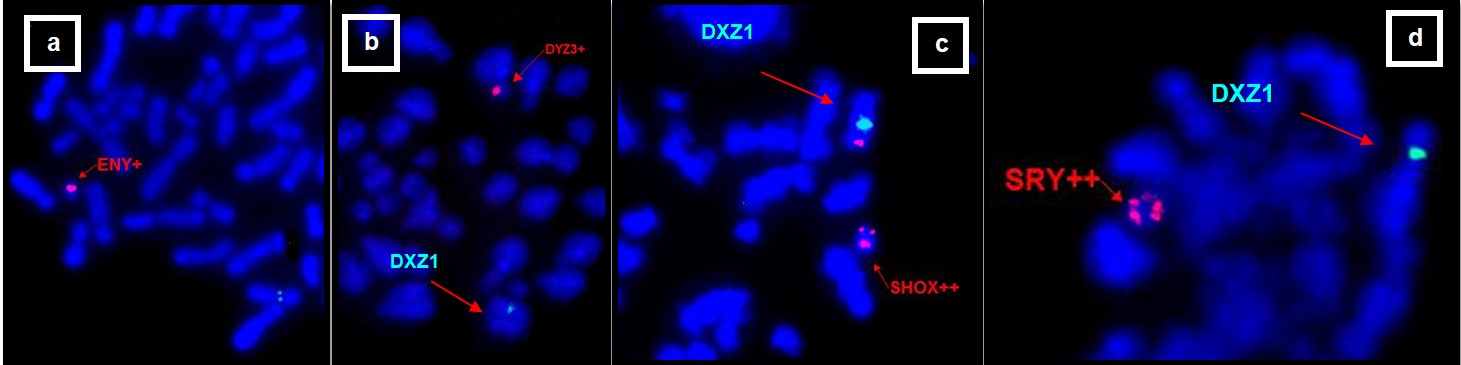


**Figure S13.** FISH results for participant 17. Partial metaphases showing an isochromosome for short arm of Y chromosome: (a) one copy of ENY (red); (b) one copy of DXZ1 (green) and one copy of DYZ3 (red); (c) one copy of DXZ1 (green) and two copies of SHOX (red); and (d) one copy of DXZ1 (green) and two copies of SRY(red), all indicated by red arrows.
